# Supplementary material for: Synthesis of a high-surface area V2O5/TiO2–SiO2catalyst and its application in the visible light photocatalytic degradation of methylene blue
Source: Royal Society of Chemistry journal article supplement (doi:10.1039/c9ra03866c), 2019-01-01
Supplement: c9ra03866c1.pdf [file c9ra03866c1.pdf]

## Synthesis of a high surface area $V_2O_5/TiO_2-SiO_2$ catalyst and its application in the visible light photocatalytic degradation of methylene blue

A. Ajay Kumar, G. Srinath, C. Suman, S. Siliveri, G. Sripal Reddy, N. Venkatathri\*

Department of Chemistry, National Institute of Technology, Warangal 506 004, Telangana, India. (\* - corresponding author, E-mail: [venkatathrin@yahoo.com](mailto:venkatathrin@yahoo.com) and Mobile: +91-9491319976)

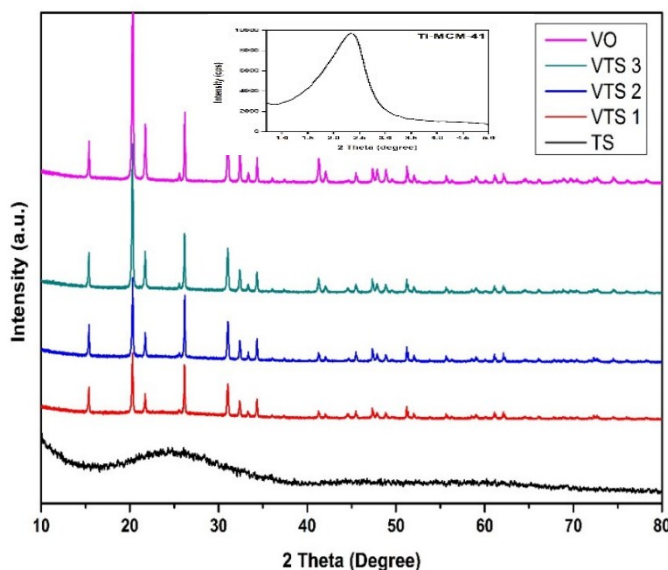

**Fig. S1.** Low angle (inset) and wide angle X-ray diffraction pattern of Ti-containing mesoporous materials and their  $V_2O_5$  Catalyst.

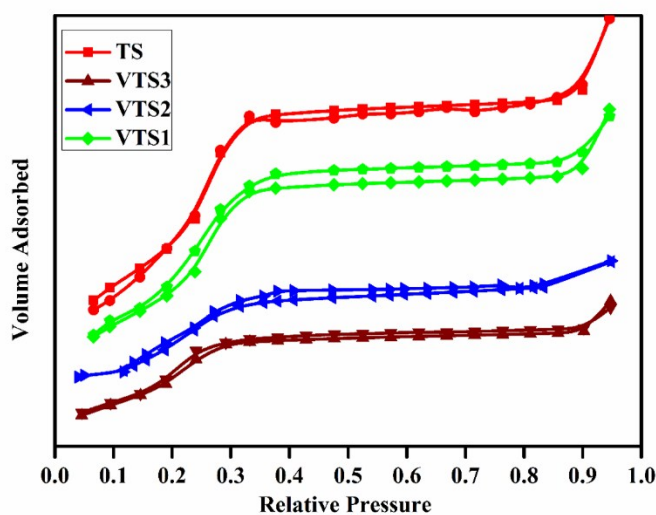

**Fig. S2.**  $N_2$  -adsorption/desorption isotherm of TS, VTS1, VTS2 and VTS3 catalyst

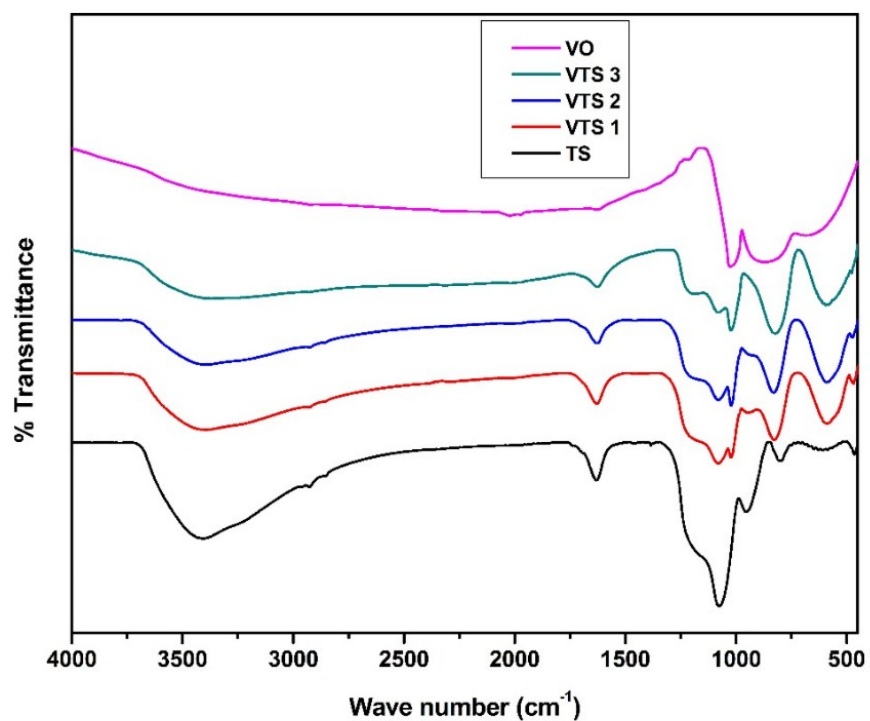

**Fig. S3.** FT-IR spectra of pure TS, pure VO, VTS1, VTS2 and VTS3 catalyst

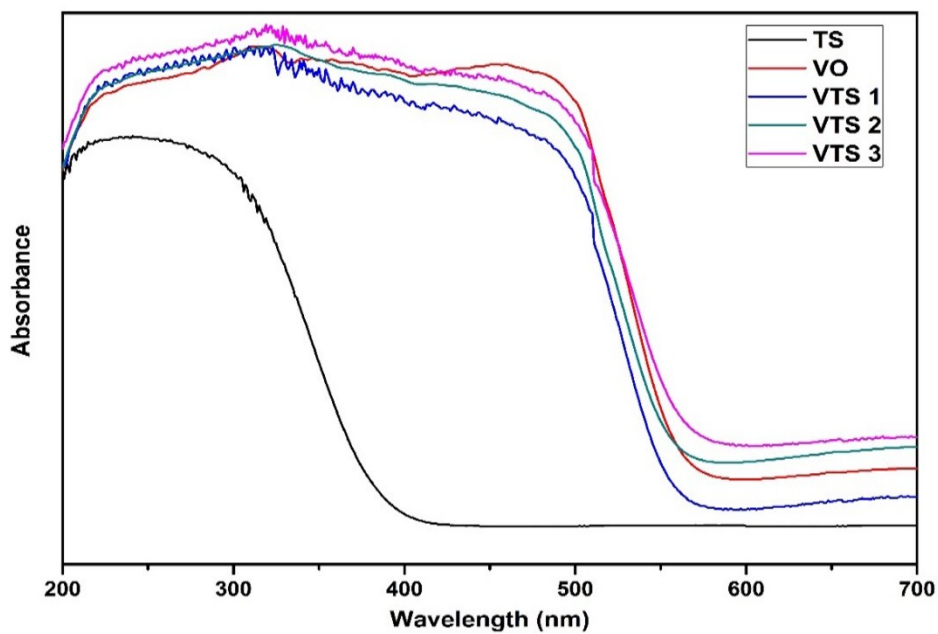

**Fig. S4.** UV-Visible DRS spectra of pure TS, pure VO, VTS1, VTS2 and VTS3 catalyst

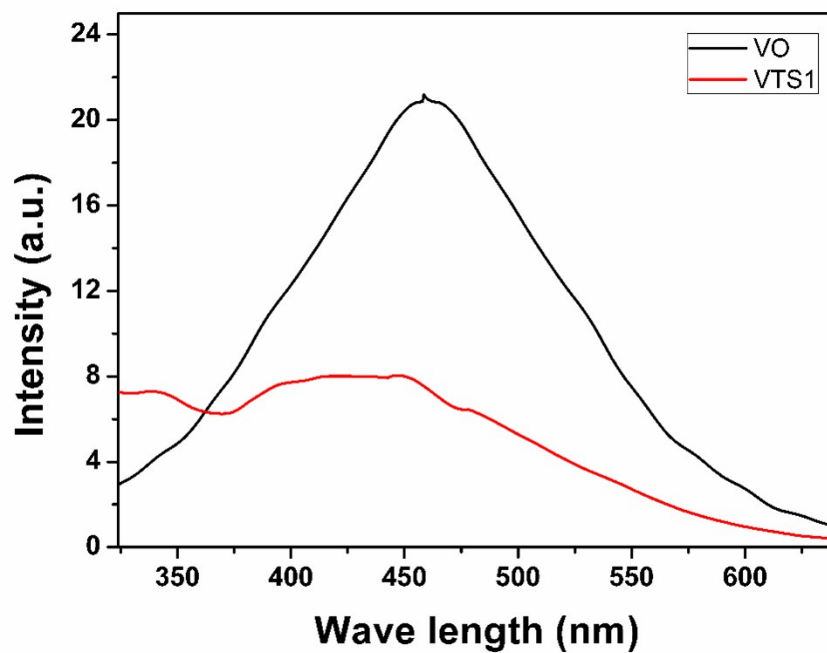

Fig. S5. Photoluminescence spectra of pure VO and VTS1 hybrid catalyst

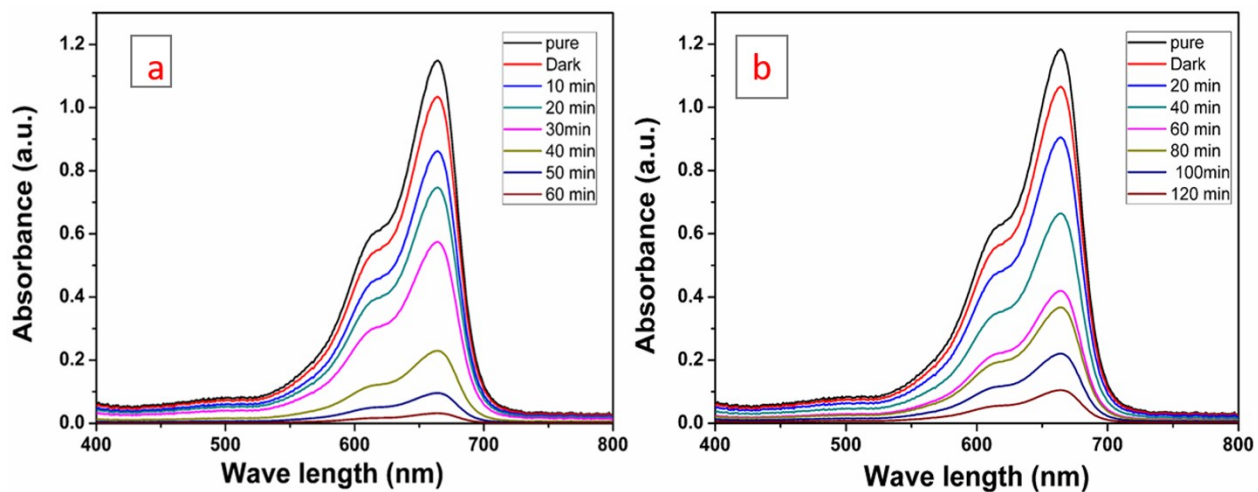

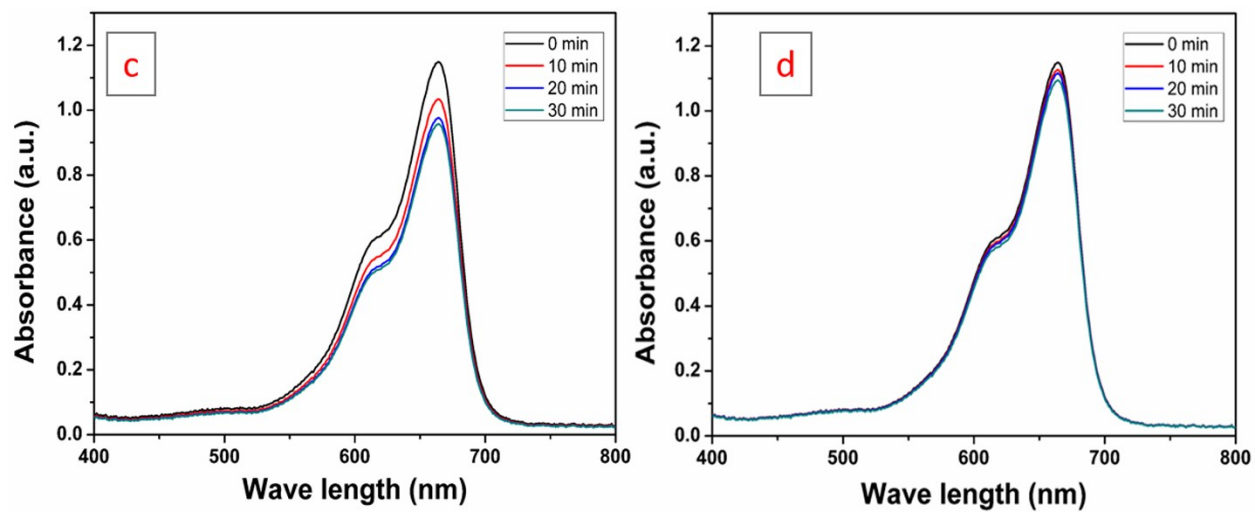

**Fig. S6.** Photocatalytic degradation of MB dye under the irradiation of (a) direct sunlight, (b) visible light, (c) catalyst adsorption for the VTS catalysts and (d) photolysis of MB
